# Supplementary material for: Medical Photography Usage Amongst Doctors at a Portuguese Hospital
Source: MDPI journal article supplement (doi:10.3390/ijerph19127304), 2022-06-14
Supplement: s1 [file s1]

**Supplementary Material S1**  
**Medical Photography Questionnaire**

1. Medical Specialty: \_\_\_\_\_

- ☐ Specialist
- ☐ Resident

2. Gender

- ☐ Female
- ☐ Male

3. Age:

- ☐ 20-40 years old
- ☐ 41-60 years old
- ☐ 61 years old or older

4. When you take a photograph/record a video of a patient, why do you do it? (fill all that apply)

- ☐ I do not use it on any occasion
- ☐ To document the patients' clinical progress
- ☐ Ask a colleague for a second opinion
- ☐ For educational purposes
- ☐ Research and publication
- ☐ To present at a medical conference
- ☐ Register a biopsy site
- ☐ Document wound appearance after surgery
- ☐ Document a surgical procedure in the operating room
- ☐ For legal purposes
- ☐ For pathology reasons
- ☐ For patient motivation, instruction and advisement of the patient
- ☐ Other: \_\_\_\_\_

**If you selected "I do not use it on any occasion", only answer the questions with an \***

5. How often do you take photographs of patients?

- ☐ Several times a day
- ☐ Daily
- ☐ Weekly
- ☐ Monthly
- ☐ Annually
- ☐ Never

6. How often do you record videos of patients?

- ☐ Several times a day
- ☐ Daily
- ☐ Weekly
- ☐ Monthly
- ☐ Annually
- ☐ Never

7. With which device do you take photographs/record videos of patients'?

- ☐ DSLR camera
- ☐ Compact camera
- ☐ Phone camera
- ☐ Clinical photography application (If so, which: \_\_\_\_\_)
- ☐ Other: \_\_\_\_\_

8. The device is:

- ☐ Personal
- ☐ Personal only for professional use
- ☐ Institutional

9. If you answered on question 7 to phone camera, which one do you use and what model (if you remember)

- ☐ iPhone
- ☐ Samsung

- ☐ Huawei
- ☐ Xiaomi
- ☐ OnePlus

- ☐ Blackberry
- ☐ LG
- ☐ Other: \_\_\_\_\_

\*10. How frequently do/\*would you ask for a patient consent for taking a photograph/recording a video?

- |                                                  |                                          |
|--------------------------------------------------|------------------------------------------|
| <input type="checkbox"/> Always before taking it | <input type="checkbox"/> When I remember |
| <input type="checkbox"/> Always after taking it  | <input type="checkbox"/> Rarely          |
| <input type="checkbox"/> Often before taking it  | <input type="checkbox"/> Never           |
| <input type="checkbox"/> Often after taking it   |                                          |

\*11. In which situations do/\*would you ask for a verbal consent? (fill all that apply)

- |                                                                      |                                                                                            |
|----------------------------------------------------------------------|--------------------------------------------------------------------------------------------|
| <input type="checkbox"/> To document the patients' clinical progress | <input type="checkbox"/> Document wound appearance after surgery                           |
| <input type="checkbox"/> Ask for a second opinion                    | <input type="checkbox"/> Document a surgical procedure                                     |
| <input type="checkbox"/> For educational purposes                    | <input type="checkbox"/> For legal purposes                                                |
| <input type="checkbox"/> Research and publication                    | <input type="checkbox"/> For pathology reasons                                             |
| <input type="checkbox"/> To present at a medical conference          | <input type="checkbox"/> For patient motivation, instructive and advisement of the patient |
| <input type="checkbox"/> Register a biopsy site                      | <input type="checkbox"/> Other: _____                                                      |

\*12. In which situations do/\*would you ask for a written consent? (fill all that apply)

- |                                                                      |                                                                                            |
|----------------------------------------------------------------------|--------------------------------------------------------------------------------------------|
| <input type="checkbox"/> To document the patients' clinical progress | <input type="checkbox"/> Document wound appearance after surgery                           |
| <input type="checkbox"/> Ask for a second opinion                    | <input type="checkbox"/> Document a surgical procedure                                     |
| <input type="checkbox"/> For educational purposes                    | <input type="checkbox"/> For legal purposes                                                |
| <input type="checkbox"/> Research and publication                    | <input type="checkbox"/> For pathology reasons                                             |
| <input type="checkbox"/> To present at a medical conference          | <input type="checkbox"/> For patient motivation, instructive and advisement of the patient |
| <input type="checkbox"/> Register a biopsy site                      | <input type="checkbox"/> Other: _____                                                      |

\*13. Where do/\*would you document the consent?

- ☐ Patients clinical record (digital or physical)
- ☐ With the photograph
- ☐ In personal documents
- ☐ I don't (\*would) document anywhere

\*14. What do/\*would you say to the patient before obtaining his/her consent? (fill all that apply)

- ☐ Reason for medical photography
- ☐ Ask in what contexts it can be used
- ☐ Where they are stored
- ☐ Who has access
- ☐ Consent can be withdrawn at any time without compromise in the patient-doctor relationship, and that photographs will be deleted if the patient wishes
- ☐ How long the consent lasts

15. What measures do (\*would) you take when taking photographs of a patient? (fill all that apply)

- ☐ Light
- ☐ Background
- ☐ Center subject
- ☐ Show anatomical landmarks or scales for posterior reference
- ☐ Focus
- ☐ Image Sharpness
- ☐ Realistic colour
- ☐ White balance
- ☐ Not include unnecessary elements

☐ Does not apply

16. What measures do (\*would) you take when recording a video of a patient? (fill all that apply)

- ☐ Light
- ☐ Background
- ☐ Center subject
- ☐ Show anatomical landmarks or scales for posterior reference
- ☐ Focus
- ☐ Image Sharpness
- ☐ Realistic colour
- ☐ White balance
- ☐ Not include unnecessary elements
- ☐ Does not apply

17. Do you use a program to enhance the photograph quality or to edit videos of patients? (If yes, which program and what do you do?)

- ☐ For photographs: \_\_\_\_\_
- ☐ For videos: \_\_\_\_\_
- ☐ I do not use

18. Where do you store patients photographs/videos? (fill all that apply)

- ☐ On the device where the recording was obtained
- ☐ Personal device
- ☐ Personal device only for professional use
- ☐ Institutional device
- ☐ Patients' digital record
- ☐ Specific institutional server
- ☐ Personal Cloud (Google Drive, iCloud, Dropbox...)
- ☐ Personal Cloud only for professional use (Google Drive, iCloud, Dropbox...)
- ☐ Personal hard-drive or equivalent
- ☐ Personal hard-drive or equivalent only for professional use
- ☐ Institutional hard-drive or equivalent
- ☐ Does not apply

19. How do you transfer the recordings? (fill all that apply)

- ☐ Personal email
- ☐ Institutional email
- ☐ Cable that links to a computer
- ☐ Cable that uses the computer as a bridge to a central safe server
- ☐ Download from an unknown Wi-Fi
- ☐ Download from a secure Wi-Fi
- ☐ Secure transfer application
- ☐ Bluetooth
- ☐ Does not apply

20. When do you delete the recordings from the device?

- ☐ Immediately after storing them in another place that is not the device
- ☐ When I remember after storing them in another place that is not the device
- ☐ It always stays in the device
- ☐ Does not apply

21. What measures do you take in order to ensure the devices security? (fill all that apply)

- ☐ Password (6 or more digits)
- ☐ Encryption
- ☐ 2-factor authentication
- ☐ Stored in a safe place with restricted access
- ☐ Cloud backup (Google Drive, iCloud, Dropbox...)
- ☐ Keep software updated (for security bugs)
- ☐ Remote deletion of the device content
- ☐ Connection to safe Wi-Fi
- ☐ GPS, date, and hour disabled for photographs
- ☐ Unknown, device security handled by the institution
- ☐ None of the above/unknown

22. If the photographs/videos are used to ask for a second opinion, how are they sent? (fill all that apply)

- ☐ Personal email
- ☐ Institutional email
- ☐ SMS
- ☐ WhatsApp
- ☐ Viber
- ☐ Messenger
- ☐ Secure medical photography app
- ☐ Does not apply
- ☐ Other: \_\_\_\_\_

\*23. Have you ever received a photograph/video of a patient for your second opinion?

- ☐ Yes
- ☐ No

\*24. If you answered yes on question 23, how frequently?

- ☐ Several times a day
- ☐ Daily
- ☐ Weekly
- ☐ Monthly
- ☐ Annually
- ☐ Never

\*25. If you answered yes on 23, how are they sent? (fill all that apply)

- ☐ Personal email
- ☐ Institutional email
- ☐ SMS
- ☐ WhatsApp
- ☐ Viber
- ☐ Messenger
- ☐ Secure medical photography app
- ☐ Does not apply
- ☐ Other: \_\_\_\_\_

\*26. Have you ever used photographs/videos of patients in any of the following occasions? (fill all that apply)

- ☐ Digital or physical publication
- ☐ Medical congress presentation
- ☐ Education
- ☐ Publicity

☐ Never used

\*27. If you wanted to use the photograph/video for means that were not initially discussed with the patient and it is possible to make the recording anonymous, what do/\*would you do?

- ☐ Warn the patient that the recording will be used
- ☐ Ask for verbal consent
- ☐ Ask for written consent
- ☐ I do/\*would not ask for consent

\*28. If you wanted to use the photograph/video for means that were not initially discussed with the patient and it is not possible to make the recording anonymous, what do/\*would you do?

- ☐ Warn the patient that the recording will be used
- ☐ Ask for verbal consent
- ☐ Ask for written consent
- ☐ I do/\*would not ask for consent

\*29. Have you ever taken a photograph of a patients' clinical record or of medical exams with a personal device?

- ☐ Yes
- ☐ No

\*30. Have you ever shared the photograph mentioned in question 29?

- ☐ Yes
- ☐ No

Comments:

**Supplementary Material S2**

Discrimination of categories: 35 specialties included

| <b>Medical specialties</b>           | <b>Medico-surgical specialties</b> | <b>Surgical specialties</b>    |
|--------------------------------------|------------------------------------|--------------------------------|
| Anaesthesiology                      | Dermatology                        | Angiology and Vascular Surgery |
| Anatomical Pathology                 | Obstetrics and Gynaecology         | Cardiothoracic Surgery         |
| Cardiology                           | Ophthalmology                      | General Surgery                |
| Clinical Pathology                   | Otorhinolaryngology                | Maxillofacial Surgery          |
| Clinical Pharmacology                | Stomatology                        | Neurosurgery                   |
| Endocrinology                        | Urology                            | Orthopaedic surgery            |
| Family Medicine                      |                                    | Paediatric Surgery             |
| Gastroenterology                     |                                    | Plastic Surgery                |
| Haematology                          |                                    |                                |
| Infectious Diseases                  |                                    |                                |
| Intensive Care Medicine              |                                    |                                |
| Internal Medicine                    |                                    |                                |
| Medical Genetics                     |                                    |                                |
| Nephrology                           |                                    |                                |
| Neurology                            |                                    |                                |
| Oncology                             |                                    |                                |
| Paediatrics                          |                                    |                                |
| Physical Medicine and Rehabilitation |                                    |                                |
| Pneumology                           |                                    |                                |
| Psychiatry                           |                                    |                                |
| Rheumatology                         |                                    |                                |
